# Supplementary material for: Occurrence and Spread of the Invasive Asian Bush Mosquito Aedes japonicus japonicus (Diptera: Culicidae) in West and North Germany since Detection in 2012 and 2013, Respectively
Source: PLoS One. 2016 Dec 9;11(12):e0167948. doi: 10.1371/journal.pone.0167948 (PMC5148077; doi:10.1371/journal.pone.0167948)
Supplement: S1 Table — (XLSX) [file pone.0167948.s001.xlsx]

## Sheet: West Germany
grid cell	cemetery coordinates		August 2012	May 2013	August 2013	May 2014	August 2014	May 2015	August 2015
	latitude	longitude
C06	50.7726	6.23314	negative		negative	negative	negative		negative
C06	50.8116	6.5827	negative		negative	negative	negative		negative
C06	50.7573	6.27882	negative		negative	negative	negative		negative
C07	50.7296	6.18664	negative		negative		negative		negative
C07	50.7016	6.16013	negative		negative		negative		negative
C07	50.7135	6.2143	negative		negative		negative		negative
C08	50.6116	6.2998			negative
C08	50.6302	6.27626			negative
C08	50.5859	6.25252			negative
D01	51.263414	6.331348							negative
D01	51.2496	6.379610							negative
D01	51.209	6.344934							negative
D02	51.139022	6.409064							negative
D02	51.115847	6.415887							negative
D02	51.1603	6.353333							negative
D03	50.940390	6.821126							negative
D03	51.0853	6.307566							negative
D03	51.0623	6.347681							negative
D04	50.9285	6.31548			negative	negative	negative		negative
D04	50.9294	6.25413			negative	negative	negative		negative
D04	50.9629	6.37672			negative	negative	negative		negative
D05	50.8474	6.37106					negative		negative
D05	50.8602	6.3997					negative		negative
D05	50.8856	6.40766					negative		negative
D06	50.8145	6.44024			negative	negative	negative		negative
D06	50.7975	6.43716			negative	negative	negative		negative
D06	50.8147	6.35501			negative	negative	negative		negative
D07	50.7333	6.39422					negative		negative
D07	50.7092	6.37987					negative		negative
D07	50.6961	6.43753					negative		negative
D08	50.5855	6.35547			negative				negative
D08	50.5878	6.35903			negative				negative
D08	50.6156	6.38594			negative				negative
D09	50.4922	6.44004							negative
D09	50.5425	6.41125							negative
D09	50.5569	6.45063							negative
D10	50.4957	6.458			negative
D10	50.4589	6.40229			negative
D10	50.4319	6.43341			negative
E01	51.211359	6.483096							negative
E01	51.262	6.540761							negative
E01	51.2382	6.539828							negative
E02	51.157781	6.495451							negative
E02	51.1734	6.449579							negative
E02	51.1351	6.522317							negative
E03	51.0327	6.45366			negative	negative	negative		negative
E03	50.1318	6.95541			negative	negative	negative		positive
E03	51.043	6.57669			negative	negative	negative
E04	50.9688	6.45864	negative	negative	negative	negative	negative	negative	negative
E04	50.9399	6.57804	negative	negative	negative	negative	negative	negative	negative
E04	50.9468	6.52627	negative	negative	negative		negative	negative	negative
E05	50.8541	6.58624	negative	negative	negative		negative	negative	negative
E05	50.8386	6.58335	negative	negative	negative		negative	negative	negative
E05	50.8627	6.49423			negative		negative	negative	negative
E06	50.8024	6.49948			negative		negative
E06	50.8054	6.50845			negative		negative		positive
E06	50.8283	6.46687			negative		negative		negative
E07	50.7133	6.5711	negative		negative	negative	negative		negative
E07	50.6894	6.47878	negative		negative	negative	negative		positive
E07	50.6711	6.56767	negative		negative	negative	negative
E08	50.6346	6.47055			negative		negative		positive
E08	50.566	6.49708			negative		negative
E08	50.5935	6.57127			negative		negative
E09	50.4976	6.52158	negative	negative	negative	negative	negative		negative
E09	50.4798	6.57759	negative	negative	negative	negative	negative		negative
E09	50.5286	6.46989	negative	negative	negative	negative	negative		negative
E10	50.4233	6.55547	negative		negative	negative	negative
E10	50.3814	6.53839	negative		negative	negative	negative
E10	50.4713	6.52727	negative		negative	negative	negative
E11	50.3157	6.60076	negative	negative	negative	negative	negative
E11	50.3562	6.52671	negative	negative	negative	negative	negative
E11	50.3524	6.52924	negative	negative	negative	negative	negative
E12	50.2885	6.56919			negative		negative
E12	50.2599	6.56728			negative		negative
E12	50.2354	6.53043			negative		negative
F01	51.195	6.66333					negative		negative
F01	51.2165	6.61715					negative		negative
F01	51.199	6.60654					negative		negative
F02	51.161420	6.664207					negative		negative
F02	51.1553	6.69811					negative		negative
F02	51.1241	6.67878					negative		negative
F03	51.0911	6.59832			negative	negative	negative		positive
F03	51.034142	6.678890			negative	negative	negative
F03	51.079	6.63479			negative	negative	negative
F04	50.9883	6.67033	negative	negative	negative		negative	negative	negative
F04	50.9635	6.60912	negative	negative	negative		negative	negative	negative
F04	50.942	6.68344	negative	negative	negative		negative	negative	positive
F05	50.9095	6.67502	negative	negative	negative	negative	negative
F05	50.849	6.7661	negative	negative	negative	positive	positive	positive	positive
F05	50.8594	6.63792	negative	negative	negative	negative
F06	50.8057	6.64584	negative	negative	negative	negative	negative	negative	negative
F06	50.753640	6.658119	negative	negative	negative	negative	negative	negative	positive
F06	50.7598	6.63923	negative	negative	negative	positive	positive	negative
F07	50.7407	6.6669	negative		negative	negative	negative	negative	positive
F07	50.695	6.65412	negative		negative	negative	negative	negative	negative
F07	50.6586	6.64816	negative		negative	negative	negative	negative	negative
F08	50.5963	6.656	negative	negative	positive	negative	negative		negative
F08	50.6161	6.65093	negative	negative	negative	negative	negative		negative
F08	50.6207	6.70594	negative	negative		negative	negative		negative
F09	50.5108	6.65914	negative	negative	negative	negative	negative		negative
F09	50.4925	6.64062	negative	negative	negative	negative	negative		negative
F09	50.5425	6.65099	negative	negative	negative	negative	negative		negative
F10	50.475	6.71154	negative	negative	negative		negative	negative	negative
F10	50.4107	6.7283	positive	negative	positive	positive	negative	negative	negative
F10	50.4431	6.62549	negative	negative	negative		negative	negative	negative
F11	50.3393	6.6726	negative		negative	negative	negative		negative
F11	50.2932	6.66886	negative		negative	negative	negative		negative
F11	50.3103	6.73466	negative		negative	negative	negative		negative
G00	51.301114	6.848671							negative
G00	51.3361	6.854026							negative
G00	51.335	6.790296							negative
G01	51.2029	6.80083					negative		negative
G01	51.197	6.75589					negative		negative
G01	51.2538	6.77226					negative		negative
G02	51.1173	6.77154			negative	negative	negative		positive
G02	51.1303	6.72608			negative	negative	negative
G02	51.1216	6.8444			negative	negative	negative
G03	51.090615	6.820285				negative	negative	negative	positive
G03	51.0684	6.80614				negative	negative	negative
G03	51.0614	6.85903				negative	negative	negative
G04	51.0007	6.79573	negative		negative	negative		negative
G04	50.9827	6.78624	negative		negative	negative	negative	negative
G04	50.9587	6.77469	negative		negative	negative	positive	negative	positive
G05	50.8894	6.82563	negative	negative	positive	positive	positive	positive	positive
G05	50.8578	6.75023	positive	negative	negative
G05	50.9063	6.81571	negative	negative	negative	negative	negative
G06	50.8067	6.7623	positive	negative	positive	negative	positive	positive	positive
G06	50.7366	6.83807	negative	negative	negative	negative
G06	50.7539	6.7787	negative	negative	negative	positive	negative
G07	50.685	6.82179	negative	negative	negative	negative	negative	negative
G07	50.6257	6.81197	negative	negative	negative	positive	negative	negative
G07	50.6679	6.77697	negative	negative	negative	negative	negative	negative	positive
G08	50.6049	6.84082	negative	negative	positive	positive	positive	negative	negative
G08	50.6279	6.85442	negative	negative				negative	negative
G08	50.654	6.83194	negative	negative	negative	negative	negative	negative	negative
G09	50.4797	6.84842	negative	negative	negative	negative	positive	negative	positive
G09	50.5621	6.76481	negative	negative	negative	negative		negative
G09	50.5105	6.80527	negative	negative	negative	negative		negative
G10	50.4034	6.83106	negative	negative	negative	positive	negative	negative	negative
G10	50.446	6.88935	negative	negative	negative		negative	negative	positive
G10	50.4456	6.81381	negative	negative	negative		negative	negative
G11	50.3403	6.756	negative	negative	negative	negative	negative		negative
G11	50.3305	6.78878	negative	negative	negative	negative	negative		negative
G11	50.374	6.77679	negative	negative	negative	negative	negative		negative
G12	50.2104	6.88947	negative	negative	negative	negative	negative		negative
G12	50.2529	6.78158	negative	negative	negative	negative	negative		negative
G12	50.2567	6.87951	negative	negative	negative	negative	negative		negative
G14	50.0932	6.81404							negative
G14	50.0932	6.87378							negative
G14	50.0394	6.80111							negative
G15	49.9959	6.83326							negative
G15	50.0072	6.83364							negative
G15	49.9579	6.91254							negative
G16	49.9243	6.83553							negative
G16	49.9043	6.8842							negative
G16	49.9044	6.8371							negative
H01	51.2162	6.91227					negative		negative
H01	51.2073	6.94818					negative		negative
H01	51.2586	6.90563					negative		negative
H02	51.1114	6.94632			negative		negative	negative	negative
H02	51.1644	6.93999			negative		negative	negative	negative
H02	51.1504	6.86834			negative		negative	negative	negative
H03	51.0352	6.90643		negative	negative	negative	negative	negative	positive
H03	51.0166	6.8577		negative	negative	negative	negative	negative
H03	51.0394	6.93412		negative	negative	negative	negative	negative
H04	50.9198	7.08677	negative	negative	negative	negative	negative
H04	50.9384	6.91536	negative	negative	negative	negative	negative
H04	50.882	7.00272	negative	negative	negative	negative	positive	positive	positive
H05	50.8656	6.88252	negative	negative	negative	negative	negative
H05	50.8582	6.93079	negative	negative	negative	negative	positive	positive	positive
H05	50.8684	6.96101	negative	negative	negative	negative
H06	50.7726	6.92188	positive	positive	positive	positive	positive	positive	positive
H06	50.8421	7.00358	negative
H07	50.7397	7.00519	positive	positive	positive	positive	positive	positive	positive
H07	50.7345	6.88798	negative
H08	50.6229	6.9461	negative	negative	negative	negative
H08	50.6144	6.94104	negative	negative	negative	positive	positive	positive	positive
H08	50.5942	6.93018	negative	negative	negative	negative
H09	50.4842	6.96932	negative	negative	positive	positive	positive	negative	positive
H09	50.5535	6.93878	negative	negative				negative
H09	50.5166	6.98586	negative	negative				negative
H10	50.4425	6.9315	negative	negative	negative		negative	negative	negative
H10	50.4058	7.01732	negative	negative	positive	positive	negative	negative	negative
H10	50.44	6.90785	negative	negative			negative	negative	positive
H11	50.3922	7.0304						negative	negative
H11	50.3866	6.92423	positive	positive	positive	positive	positive	negative	positive
H11	50.3515	6.93384						negative
H12	50.2546	6.93374	negative	negative	negative	negative	negative		negative
H12	50.3196	6.91295	negative	negative	negative	negative	negative		negative
H12	50.2874	6.91636	negative	negative	negative	negative	negative		negative
H13	50.1296	7.00989					negative		negative
H13	50.1734	6.9466					negative		negative
H13	50.1867	7.0052					negative		negative
H14	50.0645	6.99227							negative
H14	50.0879	7.0206							negative
H14	50.1106	6.96635							negative
H15	49.9802	7.00758							negative
H15	49.9752	7.04014							negative
H15	49.9786	7.02721							positive
H16	49.9128	7.00751							negative
H16	49.8803	6.95172							negative
H16	49.8772	6.92523							negative
H17	49.8228	6.90108							negative
H17	49.8002	6.91818							negative
H17	49.7897	6.96872							negative
I01	51.2457	7.03317							negative
I01	51.2235	7.06808							negative
I01	51.2769	7.02083							negative
I02	51.1587	7.10453					negative	negative	negative
I02	51.1531	7.06969					negative	negative	negative
I02	51.1182	7.11179					negative	negative	negative
I03	51.0818	7.12334			negative	negative	negative
I03	51.1061	7.01047			negative	negative	negative		positive
I03	51.0899	7.03627			negative	negative	positive	positive
I04	50.9753	7.14315	negative	negative	negative	negative
I04	50.9683	7.15609	negative	negative	negative	positive	positive	positive	positive
I04	50.9571	7.1193	negative	negative	negative
I05	50.8533	7.09101	negative	negative	positive	negative	positive	positive	positive
I05	50.8876	7.06327	negative	negative	negative	negative
I05	50.9205	7.08427	negative	negative		negative
I06	50.8198	7.1736	positive	positive	positive	positive	positive	positive	positive
I07	50.7544	7.0687	negative	negative	positive	positive	positive	positive	positive
I07	50.6847	7.07569	negative	negative	negative
I07	50.7221	7.07045	negative	negative
I08	50.6373	7.0915	positive	positive	positive	positive
I08	50.5699	7.09758	negative	negative
I08	50.6239	7.13889					positive	positive	positive
I09	50.5402	7.09849	negative	positive	positive	positive	positive	positive	positive
I09	50.5632	7.11401	negative
I09	50.5357	7.04469	negative
I10	50.4202	7.12033	positive	negative	positive	positive	positive	negative	positive
I10	50.4044	7.14708		negative				negative
I10	50.4438	7.0853		negative				negative
I11	50.3946	7.17664	positive	positive	positive	positive	positive	negative	positive
I11	50.3534	7.05041	negative					negative
I11	50.3763	7.09456	negative					negative
I12	50.2609	7.08136	negative	negative	negative	negative	negative		negative
I12	50.2291	7.1287	negative	negative	negative	negative	negative		negative
I12	50.2993	7.16249	negative	negative	negative	negative	negative		positive
I13	50.1459	7.16339							positive
I14	50.102	7.11608							negative
I14	50.098	7.13697							negative
I14	50.0785	7.12906							positive
I15	50.0254	7.18463							positive
I16	49.9131	7.06161							negative
I16	49.9123	7.07809							positive
I16	49.8997	6.95461							negative
I17	49.8128	7.12575							negative
I17	49.8373	7.15334							negative
I17	49.7937	7.09312							negative
J01	51.257618	7.101023							negative
J01	51.256677	7.172384							negative
J01	51.2296	7.21517							negative
J02	51,198135	7,266706						negative	positive
J02	51.0967	7.1897			negative	negative	negative	negative	negative
J02	51.1249	7.18269			negative	negative	negative	negative
J03	51.0395	7.21199			negative	negative	negative	negative	positive
J03	51.0577	7.25992			negative	negative	negative	negative
J03	51.0943	7.19215			negative	negative	negative	negative
J04	50.9609	7.23719	negative	negative	positive	negative	positive	negative	negative
J04	50.934151	7.284028	negative	negative		negative		negative	negative
J04	50.9888	7.18454	negative	negative	negative	negative	negative	negative	negative
J05	50.8578	7.19326	positive	positive	positive	positive	positive	negative	positive
J05	50.8991	7.18183						negative
J05	50.9172	7.19425	negative					negative
J06	50.8415	7.20592	positive	positive	positive	positive	positive	positive	positive
J07	50.7363	7.19823	positive	positive	positive	positive	positive	positive	positive
J08	50.641	7.22637	positive	negative	positive	negative
J08	50.5963	7.21645		negative		positive	positive	positive	positive
J08	50.6322	7.22774		negative
J09	50.5748	7.29628	positive	positive	positive	positive	positive	positive	positive
J09	50.5409	7.24532	negative
J09	50.5024	7.29242	negative
J10	50.4209	7.21112	negative	negative	negative
J10	50.457	7.25632	negative	negative	negative
J10	50.4517	7.30846	negative	negative	positive	positive	positive	positive	positive
J11	50.3679	7.28058	negative	negative	negative		negative	negative	negative
J11	50.3696	7.26693	negative	negative	negative		negative	negative	negative
J11	50.3266	7.23609	negative	negative	negative	positive	negative	negative	negative
J12	50.2816	7.22879	negative	negative	negative	negative	negative		positive
J12	50.2447	7.22959	negative	negative	negative	negative	negative		negative
J12	50.2704	7.31073	negative	negative	negative	negative	negative
J13	50.181	7.29868					negative		positive
J13	50.1829	7.24794					negative
J13	50.1669	7.1981					negative
J14	50.1144	7.23122							negative
J14	50.0866	7.21303							positive
J15	49.9788	7.30176							negative
J15	49.992	7.33005							negative
J15	50.0275	7.25789							positive
J16	49.8957	7.24347							negative
J16	49.8881	7.32812							negative
J16	49.8988	7.30752							negative
J17	49.8269	7.29597							negative
J17	49.7881	7.30869							negative
J17	49.8087	7.2342							negative
K01	51.2805	7.27773							negative
K01	51.2351	7.33609							negative
K01	51.2639	7.38386							negative
K02	51.1463	7.33529			negative	negative	negative		negative
K02	51.1172	7.38289			negative	negative	negative		negative
K02	51.2025	7.36674			negative	negative	negative		negative
K03	51.09	7.32498		negative	negative	negative	negative		negative
K03	51.0508	7.4312		negative	negative	negative	negative		negative
K03	51.0488	7.38002		negative	negative	negative	negative		negative
K04	50.982	7.31173	negative	negative	negative	negative	negative	negative	positive
K04	50.9906	7.40301	negative	negative	negative	negative	negative	negative
K04	51.0204	7.37865	negative	negative	negative	negative	negative	negative
K05	50.8751	7.31508	positive	negative
K05	50.8426	7.33901		negative	positive	positive	positive	positive	positive
K05	50.9254	7.37824		negative
K06	50.7799	7.34532	negative	negative	negative	positive	positive	positive	positive
K06	50.816	7.37763	negative	negative	negative	negative
K06	50.7664	7.39738	negative		negative
K07	50.7274	7.36453	negative	negative	negative	positive	positive	positive	positive
K07	50.6856	7.34457	negative	negative	negative	negative
K07	50.6842	7.43856	negative	negative	negative
K08	50.6431	7.35467	negative	negative	negative	negative	positive	positive	positive
K08	50.5923	7.34551	negative	negative	negative	negative
K08	50.6208	7.43037	negative	negative	negative	negative
K09	50.5197	7.31041	positive	positive	positive	positive	positive	positive	positive
K09	50.5494	7.4185	negative
K09	50.6637	7.42876	negative
K10	50.4527	7.38682	positive
K10	50.4168	7.33091
K10	50.4358	7.42193	negative	positive	positive	positive	positive	positive	positive
K11	50.3895	7.34344	negative	negative	negative	negative		negative	negative
K11	50.3763	7.41989	negative	negative	negative	negative	positive	negative	negative
K11	50.3528	7.3856	negative	negative	negative	negative	negative	negative	negative
K12	50.3094	7.45439	negative		negative	negative	positive	negative	positive
K12	50.2489	7.35837	negative		negative	negative		negative
K12	50.2269	7.35118	negative		negative	negative		negative
K13	50.1846	7.33765					negative		negative
K13	50.195	7.37175					negative		positive
K13	50.1906	7.4392					negative
K14	50.0668	7.35169							negative
K14	50.0747	7.4345							negative
K14	50.1093	7.4625							positive
K15	50.003	7.36388							negative
K15	49.9953	7.44475							negative
K15	49.9782	7.42399							negative
K16	49.9049	7.41636							negative
K16	49.8715	7.34351							negative
K16	49.8819	7.37399							negative
L02	51.1899	7.48977					negative		negative
L02	51.1532	7.44764					negative		negative
L02	51.1905	7.56582					negative		negative
L03	51.0802	7.52401			negative	negative	negative		negative
L03	51.0508	7.43123			negative	negative	negative		negative
L03	51.0843	7.53247			negative	negative	negative		negative
L04	50.9444	7.45353	negative		negative	negative	negative	negative
L04	50.9848	7.53767	negative		negative	negative	negative	negative	positive
L04	51.0092	7.45227	negative		negative	negative	negative	negative
L05	50.9049	7.53984	negative		negative	negative	negative	negative	positive
L05	50.921	7.49383	negative		negative	negative	negative	negative
L05	50.8602	7.54844	negative		negative	negative	negative	negative
L06	50.7687	7.4472	negative	negative	negative	negative	positive	negative	negative
L06	50.7578	7.44633	negative	negative	negative	negative		positive	positive
L06	50.8672	7.72869	negative	negative	negative	negative	negative
L07	50.6843	7.43891		negative	negative	negative	positive	negative
L07	50.7125	7.56018		negative	negative	negative		negative	positive
L07	50.6873	7.5141		negative	negative	negative		negative
L08	50.6503	7.53067	negative	negative	negative	negative	positive	positive	positive
L08	50.6227	7.51682	negative	negative	negative	negative
L08	50.6141	7.48383	negative	negative	negative	negative
L09	50.5011	7.49182	negative	negative	negative	negative	positive	positive	positive
L09	50.5515	7.5155	negative	negative	negative	negative	negative
L09	50.534	7.4588	negative	negative	negative	negative
L10	50.4107	7.56665	negative	negative	negative	negative
L10	50.4222	7.57888	negative	negative	negative	negative	positive	positive	positive
L10	50.4223	7.47531	negative	negative	positive	negative	negative
L11	50.3373	7.47405	positive	negative	positive	negative	positive	negative	positive
L11	50.3627	7.45876	negative	negative	negative	negative		negative
L11	50.3535	7.57854		negative		negative		negative
L12	50.2787	7.54419	negative	negative	negative		negative	negative
L12	50.2199	7.60544	negative	negative	negative		negative	negative	positive
L12	50.2274	7.51424	negative	negative	negative		negative	negative
L13	50.1555	7.53183	negative		negative		negative		negative
L13	50.1556	7.53352	negative		negative		negative		negative
L13	50.1765	7.55392	negative		negative		negative		negative
L14	50.3921	7.67833	negative	negative	negative	negative			negative
L14	50.0873	7.48951	negative	negative	negative	negative			negative
L14	50.1144	7.57643	negative	negative	negative	negative			negative
L15	49.9903	7.50266							negative
L15	50.0131	7.49387							negative
L15	50.0299	7.5435							negative
M02	51.1366	7.59506				negative	negative		negative
M02	51.1812	7.74874				negative	negative		negative
M02	51.1934	7.6638				negative	negative		negative
M03	50.6521	7.71709					negative		negative
M03	51.1019	7.64839					negative		negative
M03	51.0604	7.66149					negative		negative
M04	51.0144	7.64584					negative		negative
M04	50.9874	7.68799					negative		negative
M04	50.9608	7.6209					negative		negative
M05	50.8709	7.62094			negative	negative	negative	negative	positive
M05	50.9274	7.71715			negative	negative	negative	negative
M05	50.872	7.67574			negative	negative	negative	negative
M06	50.7948	7.6196			negative	negative	positive	positive	positive
M06	50.8008	7.6108			negative	negative	negative
M06	50.7701	7.67345			negative	negative
M07	50.6966	7.61664					positive	negative	positive
M07	50.692	7.66593						negative
M07	50.7416	7.62207						negative
M08	50.6618	7.65263					negative	negative	negative
M08	50.6261	7.65926					negative	negative	negative
M08	50.5978	7.60517					negative	negative	positive
M09	50.5832	7.74954			negative		negative	negative	positive
M09	50.5675	7.6883			negative		negative	negative	negative
M09	50.549	7.6631			negative		negative	negative	negative
M10	50.4354	7.65645	negative	negative	negative	negative	negative	negative	negative
M10	50.411	7.59507	negative	negative	negative	negative	negative	negative	negative
M10	50.4017	7.69705	negative	negative	negative	negative	negative	negative	negative
M11	50.3694	7.64465	negative				negative
M11	50.4025	7.61304	negative		negative		positive	positive	positive
M11	50.379	7.6275	negative		negative		negative
M12	50.289	7.62201	negative		negative		negative	negative
M12	50.3137	7.61881	negative		negative		negative	negative	positive
M12	50.2683	7.65409	negative		negative		negative	negative
M13	50.1529	7.73803	negative	negative	negative	negative	negative
M13	50.1578	7.71536	negative	negative	negative	negative	negative
M13	50.204	7.63217	negative	negative	negative	negative	negative		positive
M14	50.1094	7.71817	negative		negative		negative		positive
M14	50.1031	7.68096	negative		negative		negative
M14	50.0722	7.70096	negative		negative		negative
M15	50.0117	7.66909							negative
M15	49.9892	7.6441							negative
M15	50.0065	7.69745							negative
N04	50.9958	7.77729							negative
N04	50.9599	7.75488							negative
N04	50.9571	7.81623							negative
N05	50.904047	7.805760					negative	negative	negative
N05	50.862444	7.845902					negative	negative	negative
N05	50.9328	7.760327					negative	negative	negative
N06	50.7785	7.72517					negative	negative	negative
N06	50.7878	7.79429					negative	negative	negative
N06	50.8258	7.7441					negative	negative	negative
N07	50.6959	7.7414				negative	negative	negative	positive
N07	50.6847	7.75137				negative	negative	negative	negative
N07	50.7001	7.8304				negative	negative	negative
N08	50.636	7.74058					negative		negative
N08	50.659	7.81963					negative		negative
N08	50.6122	7.79936					negative		positive
N09	50.5155	7.81645							negative
N09	50.5303	7.76049							positive
N10	50.4686	7.79658					negative	negative	positive
N10	50.4308	7.83602					negative	negative
N10	50.4541	7.79095					negative	negative
N11	50.3296	7.76035	negative		negative	negative	negative	negative
N11	50.3083	7.78945	negative		negative	negative	negative	negative	negative
N11	50.3166	7.79722	negative		negative	negative	negative	negative	positive
N12	50.2711	7.84225						negative	negative
N12	50.3041	7.77998						negative	negative
N12	50.2565	7.78551						negative	negative
N13	50.137	7.86677							negative
N13	50.2029	7.85462							negative
N13	50.1854	7.78798							negative
N14	50.0438	7.80708	negative		negative	negative			positive
N14	50.0819	7.82117	negative		negative	negative
N14	50.0456	7.78114	negative		negative	negative			negative
N15	49.9889	7.87081	negative	negative	negative	negative			negative
N15	50.0214	7.78133	negative	negative	negative	negative			negative
N15	49.9629	7.88539	negative	negative	negative	negative			negative
N16	49.903	7.81431							negative
N16	49.9225	7.80212							negative
N16	49.895	7.83232							negative
O05	50.896630	7.867954							negative
O05	50.9426	7.889641							negative
O05	50.8856	7.966771							negative
O06	50.800103	7.909719							negative
O06	50.770984	7.941046							negative
O06	50.8182	7.944136							negative
O07	50.716967	7.983977					negative		negative
O07	50.700520	7.878174					negative		negative
O07	50.7316	7.88254					negative		negative
O08	50.6223	7.9665					negative		negative
O08	50.6262	7.88827					negative		negative
O08	50.6519	7.9472					negative		negative
O09	50.5705	7.97098							negative
O09	50.5062	7.99686							positive
O09	50.5051	7.93543							negative
O10	50.4837	7.96893							negative
O10	50.4541	7.99029							negative
O10	50.4473	7.95938							negative
O10	50.4847	7.94529							negative
O11	50.3484	7.90041							negative
O11	50.3794	7.92325							negative
O11	50.3689	8.02997							negative
O12	50.2733	7.9772							negative
O12	50.3029	7.99021							negative
O12	50.2358	7.97628							negative
O13	50.1913	7.9367							negative
O13	50.1443	7.94166							negative
O13	50.157	7.91127							negative
O14	50.0547	7.89219							negative
O14	50.1068	7.93691							negative
O14	50.1132	7.90596							negative
O15	49.9632	7.90388	negative	negative	negative	negative			positive
O15	49.995	7.95055	negative	negative	negative	negative			negative
O15	49.9861	7.92864	negative	negative	negative	negative			negative
O16	49.9201	7.92334							negative
O16	49.907	7.91846							negative
O16	49.8967	7.966							negative
P07	50.723059	8.021761							negative
P07	50.7126	8.059149							negative
P07	50.6984	8.095294							negative
P08	50.6067	8.06372							negative
P08	50.6421	8.03056							negative
P08	50.633	8.11471							negative
P09	50.5006	8.0219							negative
P09	50.508	8.09553							negative
P09	50.5385	8.04059							negative
P10	50.4519	8.05077							negative
P10	50.47	8.03699							negative
P10	50.4013	8.03496							negative
P14	50.1049	8.07746							negative
P14	50.0862	8.05088							negative
P14	50.0557	8.1187							negative
P15	49.9912	8.03061	negative	negative	negative	negative			negative
P15	50.0149	8.05674	negative	negative	negative	negative			negative
P15	49.9981	8.11321	negative	negative	negative	negative			negative
P16	49.9329	8.09481							negative
P16	49.919	8.12298							negative
P16	49.8963	8.09006							negative
Q14	50.0864	8.2818							positive
Q14	50.0607	8.26803							positive
