# Supplementary material for: Occurrence and Spread of the Invasive Asian Bush Mosquito Aedes japonicus japonicus (Diptera: Culicidae) in West and North Germany since Detection in 2012 and 2013, Respectively
Source: PLoS One. 2016 Dec 9;11(12):e0167948. doi: 10.1371/journal.pone.0167948 (PMC5148077; doi:10.1371/journal.pone.0167948)
Supplement: S2 Table — (XLSX) [file pone.0167948.s002.xlsx]

## Sheet: North Germany
grid cell	cemetery coordinates		May 2013	August 2013	May 2014	August 2014	August 2015
	latitude	longitude
A2	52.3351	8.75037	negative	negative	negative	negative	negative
A2	52.3347	8.799	negative	negative	negative	negative	negative
A2	52.3057	8.73973	negative	negative	negative	negative	negative
A3	52.2145	8.79713	negative	negative	negative	negative	negative
A3	52.2529	8.78466	negative	negative	negative	negative	negative
A3	52.263	8.73086	negative	negative	negative	negative	negative
A4	52.0554	9.16873	negative	negative	negative	negative	negative
A4	52.0746	9.10611	negative	negative	negative	negative	negative
A4	52.1404	8.78115	negative	negative	negative	negative	negative
A5	52.0662	8.76591	negative	negative	negative	negative	negative
A5	52.1032	8.79531	negative	negative	negative	negative	negative
A5	52.0265	8.83419	negative	negative	negative	negative	negative
A6	51.9938	8.7809	negative	negative	negative	negative	negative
A6	51.9657	8.74949	negative	negative	negative	negative	negative
A6	51.9471	8.74115	negative	negative	negative	negative	negative
B2	52.3686	8.99602	negative	negative	negative	negative	negative
B2	52.2651	8.95707	negative	negative	negative	negative	negative
B2	52.2785	8.89141	negative	negative	negative	negative	negative
B2	52.2649	8.85257	negative	negative	negative	negative	negative
B3	52.2252	8.9577	negative		negative		negative
B3	52.2423	8.8886	negative		negative		negative
B3	52.2516	8.9404	positive	positive	negative	positive	negative
B4	52.2006	8.96145	negative	negative	negative	positive	negative
B4	52.1616	8.85671	negative	negative	negative	negative	negative
B4	52.149	8.95869	negative	negative	negative	negative	negative
B5	52.0844	8.87446	negative	negative	negative	negative	negative
B5	52.0775	8.86057	negative	negative	negative	negative	negative
B5	52.0342	8.94818	negative	negative	negative	negative	negative
B6	51.9574	8.85861	negative	negative	negative	negative	negative
B6	51.9906	8.88227	negative	negative	negative	negative	negative
B6	51.9592	8.92973	negative	negative	negative	negative	negative
C2	52.313	9.11337	negative	negative	negative	negative	negative
C2	52.3655	9.08748	negative	negative	negative	negative	negative
C2	52.3582	9.02272	negative	negative	negative	negative	negative
C3	52.2334	9.05251	negative
C3	52.2637	9.13144	negative
C3	52.2341	9.09907	positive	positive	positive	positive	positive
C4	52.1301	9.06574	positive	positive	positive	positive	negative
C4	52.1351	9.06802					negative
C4	52.2027	9.12069	negative				negative
C5	52.0813	9.01019	negative	negative	negative	negative	negative
C5	52.1134	9.05067	positive	negative	negative	negative	negative
C5	52.106	9.07282		negative	negative	negative	negative
C6	51.9744	8.97113	negative	negative	negative	negative	negative
C6	51.9437	9.09845	negative	negative	negative	negative	negative
C6	51.9822	9.10181	negative	negative	negative	negative	negative
D1	52.4474	9.25913	negative	negative	negative	negative	negative
D1	52.4524	9.14818	negative	negative	negative	negative	negative
D1	52.4127	9.25966	negative	negative	negative	negative	negative
D2	52.3445	9.1447	negative	negative	negative	negative	negative
D2	52.3182	9.221	negative	negative	negative	negative	negative
D2	52.3622	9.2869	negative	negative	negative	negative	negative
D3	52.3771	9.34491	negative	negative	negative	negative	negative
D3	52.2344	9.15459	negative	negative	negative	negative	negative
D3	52.2229	9.16103	negative	negative	negative	negative	negative
D4	52.1289	9.24432	negative	negative	negative	negative	negative
D4	52.2112	9.28965	negative	negative	negative	negative	negative
D4	52.1826	9.21754	negative	negative	negative	negative	negative
D5	52.0741	9.23442	negative	negative	negative	negative
D5	52.0489	9.26742	negative	negative	negative	negative
D5	52.1059	9.28425	negative	negative	negative	negative
D6	51.978	9.18729	negative	negative	negative	negative	negative
D6	52.0056	9.17036	negative	negative	negative	negative	negative
D6	51.9614	9.17001	negative	negative	negative	negative	negative
E1	52.3981	9.35575	negative	negative	negative	negative	negative
E1	52.4352	9.33101	negative	negative	negative	negative	negative
E1	52.4552	9.36255	negative	negative	negative	negative	negative
E2	52.3142	9.35134	positive	positive	negative	negative	negative
E2	52.3351	9.38758			negative	positive	negative
E2	52.3371	9.38715	negative	negative	negative	negative	negative
E3	52.2301	9.23918	negative	negative	negative	negative	negative
E3	52.2763	9.36055	negative	negative	negative	negative	negative
E3	52.2865	9.33977	negative	negative	negative	negative	negative
E4	52.1321	9.31995	negative	negative	negative	negative	negative
E4	52.1603	9.31857	negative	negative	negative	negative	negative
E4	52.14	9.37844	negative	negative	negative	negative	negative
E5	52.105	9.36628	negative	negative	negative	negative	negative
E5	52.1053	9.36872	negative	negative	negative	negative	negative
E5	52.0446	9.40101	negative	negative	negative	negative	negative
F1	52.4328	9.42492	negative	negative	negative	negative	negative
F1	52.3844	9.45152	negative	negative	negative	negative	negative
F1	52.4325	9.47431	negative	negative	negative	negative	negative
F2	52.3034	9.47126	positive	positive	positive	positive	positive
F3	52.2734	9.57452	negative	negative	negative	negative	negative
F3	52.2621	9.6301	negative	negative	negative	negative	negative
F3	52.2102	9.5598	negative	negative	negative	negative	positive
F4	52.2637	9.28044	negative
F4	52.1227	9.42944	negative
F4	52.1973	9.47605	positive	positive	positive	positive	positive
F5	52.0426	9.54601	negative	negative	negative	negative	negative
F5	52.0822	9.50526	negative	negative	negative	negative	negative
F5	52.0336	9.46729	negative	negative	negative	negative	negative
F6	51.9802	9.51504	negative	negative	negative	negative	negative
F6	52.0069	9.50036	negative	negative	negative	negative	negative
F6	51.9945	9.55765	negative	negative	negative	negative	negative
G1	52.3647	9.57601	negative	negative	negative	negative	negative
G1	52.3948	9.60544	negative	negative	negative	negative	negative
G1	52.455	9.58181	negative	negative	negative	negative	negative
G2	52.3001	9.64447	positive	positive	negative	positive	positive
G2	52.3112	9.65037			negative
G2	52.3203	9.59831			positive	negative
G3	52.2168	9.69822	negative		negative		negative
G3	52.241	9.67675	positive	positive	negative	positive	negative
G3	52.2625	9.62898	negative		negative		negative
G4	52.1685	9.66187	negative	negative	negative	negative	negative
G4	52.1644	9.71133	negative	negative	negative	negative	negative
G4	52.1401	9.72365	negative	negative	negative	negative	negative
G5	52.0637	9.59194	negative	negative	negative	negative	negative
G5	52.113	9.69402	negative	negative	negative	negative	negative
G5	52.0857	9.68296	negative	negative	negative	negative	negative
H1	52.4328	9.86	negative	negative	negative	negative	negative
H1	52.4464	9.73563	negative	negative	negative	negative	negative
H1	52.4603	9.82167	negative	negative	negative	negative	negative
H2	52.37	9.74761	negative	negative	negative	negative	negative
H2	52.3342	9.71362	negative	negative	negative	negative	negative
H2	52.3922	9.68318	negative	negative	negative	negative	positive
H3	52.2834	9.78088	negative	negative	negative	negative
H3	52.2362	9.86323	positive	negative	negative
H3	52.2238	9.85087		positive	positive	positive	positive
H4	52.1857	9.81104	negative	negative	negative	negative	negative
H4	52.1578	9.77594	negative	negative	negative	negative	negative
H4	52.1149	9.73406	negative	negative	negative	negative	negative
I1	52.4447	9.89889	negative	negative	negative	negative	negative
I1	52.4422	9.97212	negative	negative	negative	negative	negative
I1	52.407	9.98676	negative	negative	negative	negative	negative
I2	52.3461	9.92537	negative	negative	negative	negative	negative
I2	52.3263	9.96686	negative	negative	negative	negative	negative
I2	52.3073	10.0426	negative	negative	negative	negative	negative
I3	52.2499	9.96921	negative	negative	negative	negative	negative
I3	52.1984	9.89005	negative	negative	negative	negative	negative
I3	52.2572	9.90526	positive	negative	negative	negative	negative
I4	52.1624	9.90393	negative	negative	negative	negative	negative
I4	52.1643	9.91994	negative	negative	negative	negative	negative
I4	52.1473	9.88152	negative	negative	negative	negative	negative
I5	52.0986	9.91659	negative	negative	negative	negative	negative
I5	52.0514	9.90181	negative	negative	negative	negative	negative
I5	52.0337	9.96473	negative	negative	negative	negative	negative
J2	52.3195	10.0544	negative	negative	negative	negative	negative
J2	52.36	10.1097	negative	negative	negative	negative	negative
J2	52.3055	10.0963	negative	negative	negative	negative	negative
J3	52.2564	10.0589	negative	negative	negative	negative	negative
J3	52.2202	10.0329	negative	negative	negative	negative	negative
J3	52.2049	10.1161	negative	negative	negative	negative	negative
J4	52.1818	10.103	negative	negative	negative	negative	negative
J4	52.1549	10.0828	negative	negative	negative	negative	negative
J4	52.158	10.158	negative	negative	negative	negative	negative
J5	52.077	10.106	negative	negative	negative	negative	negative
J5	52.0994	10.0402	negative	negative	negative	negative	negative
J5	52.038	10.1378	negative	negative	negative	negative	negative
				^s
